# Supplementary figures and images for: Interactome of PTH-Regulated miRNAs and Their Predicted Target Genes for Investigating the Epigenetic Effects of PTH (1–34) in Bone Metabolism
Source: MDPI journal article supplement (doi:10.3390/genes13081443), 2022-08-13

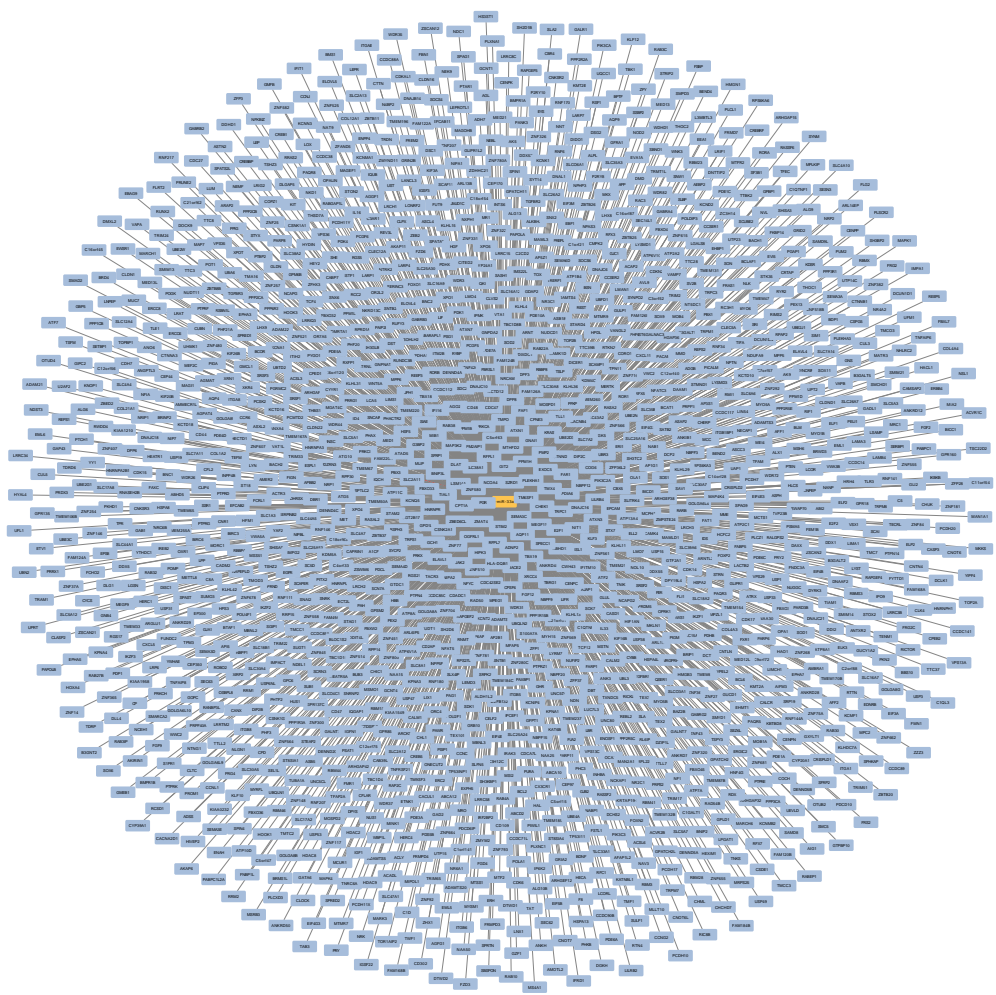

Supplement: s1 [file s1]

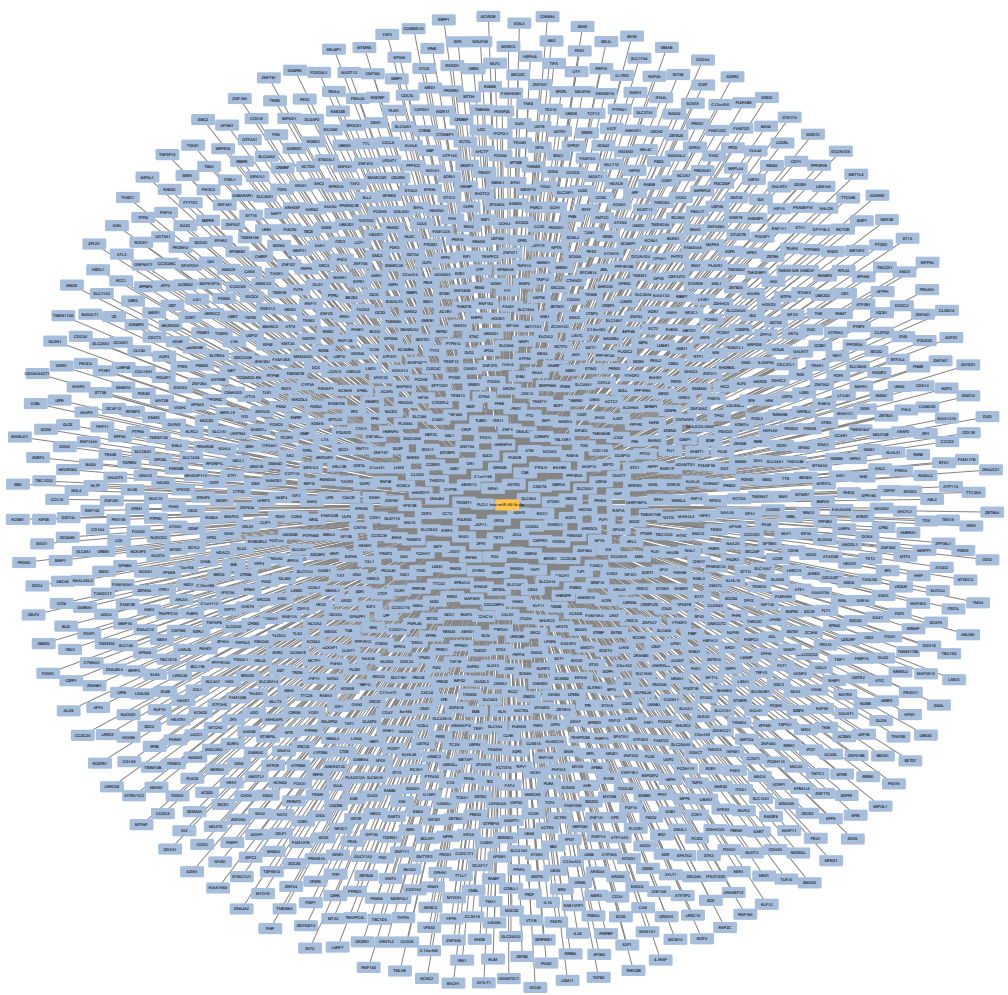

Supplement: s1 [file s1]

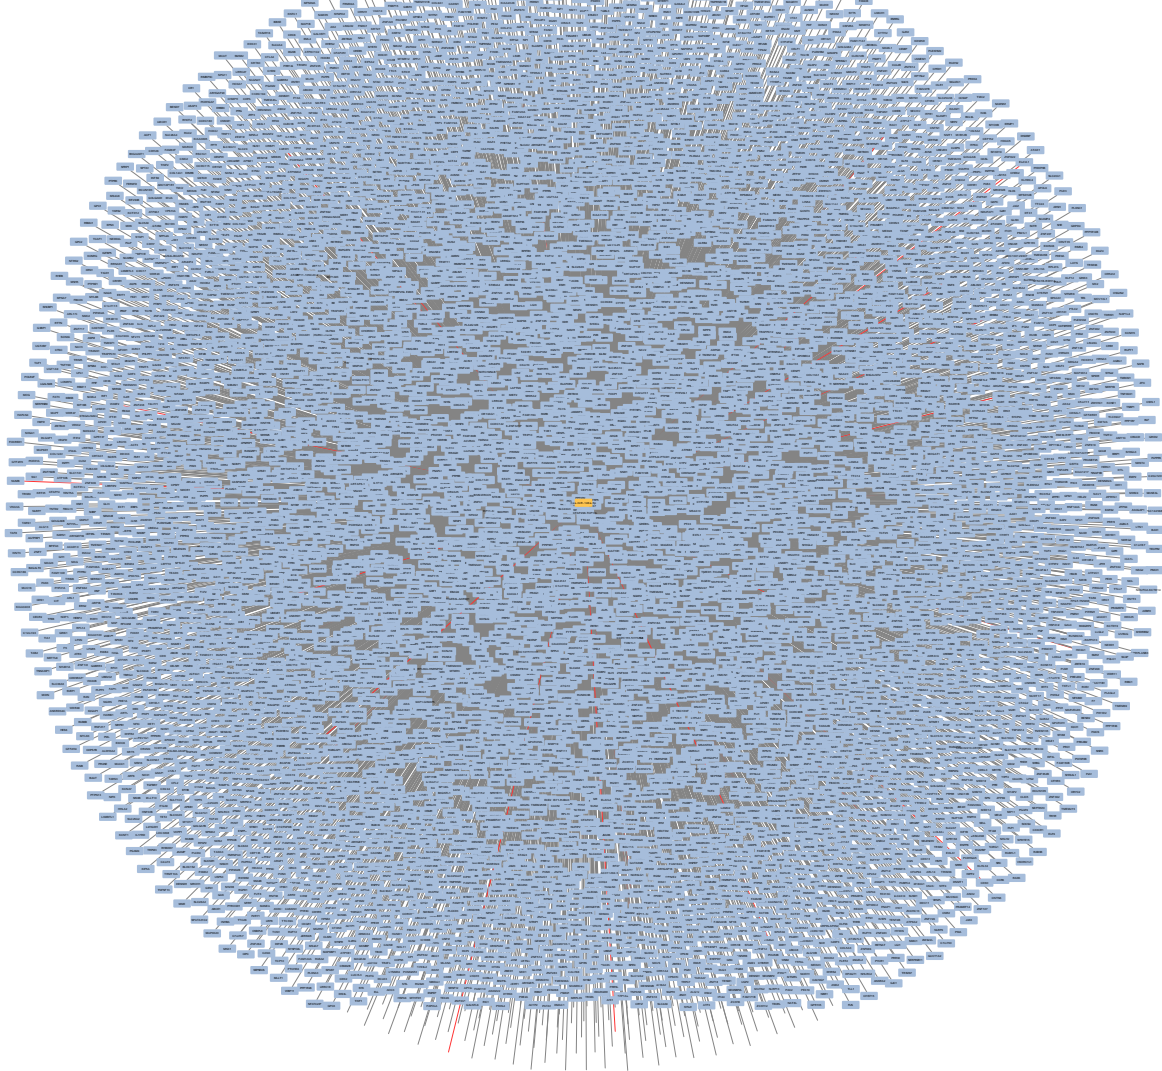

Supplement: s1 [file s1]

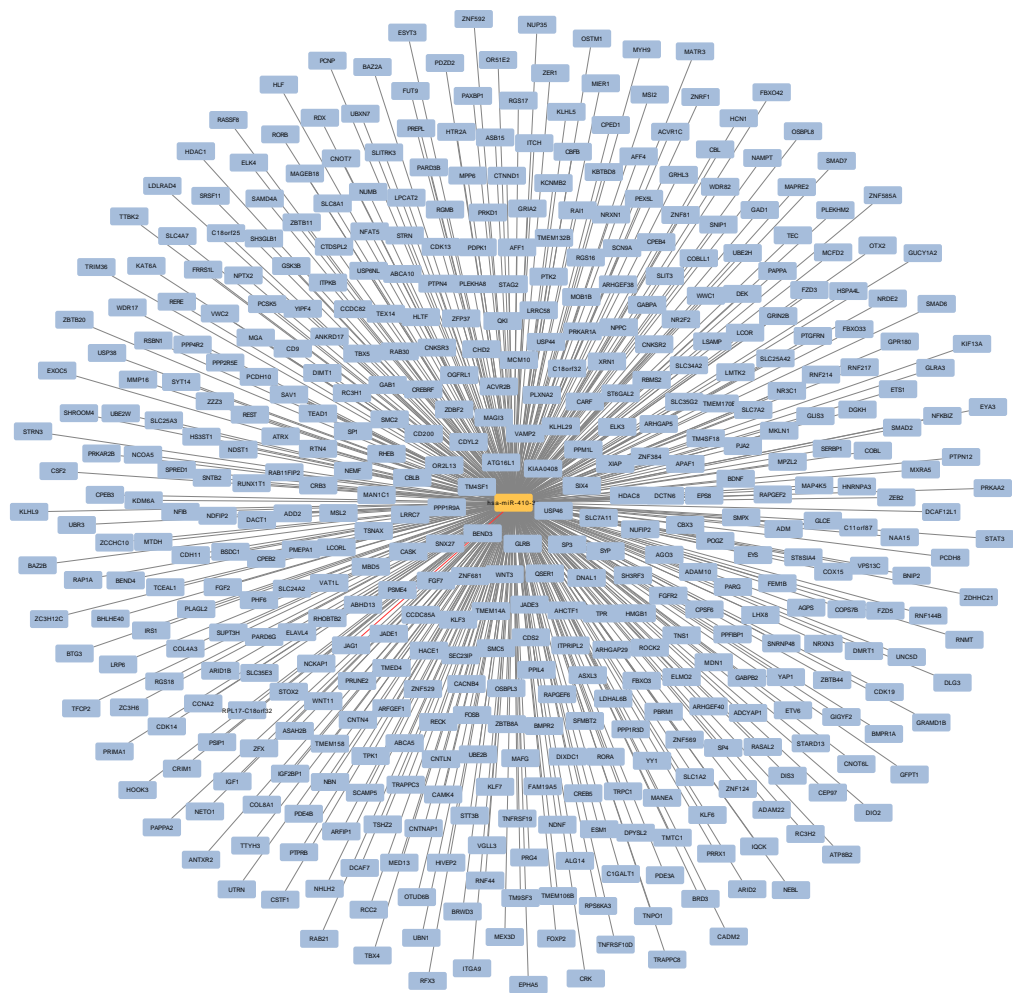

Supplement: s1 [file s1]

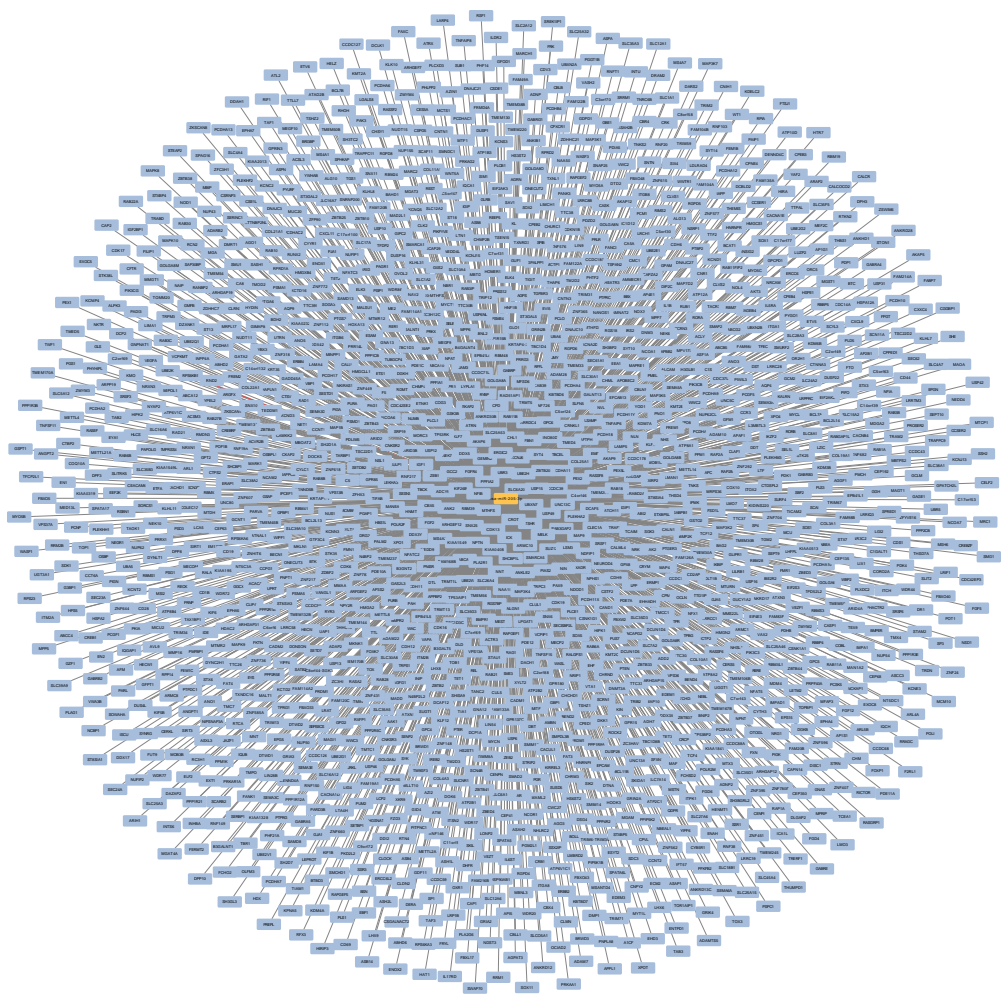

Supplement: s1 [file s1]

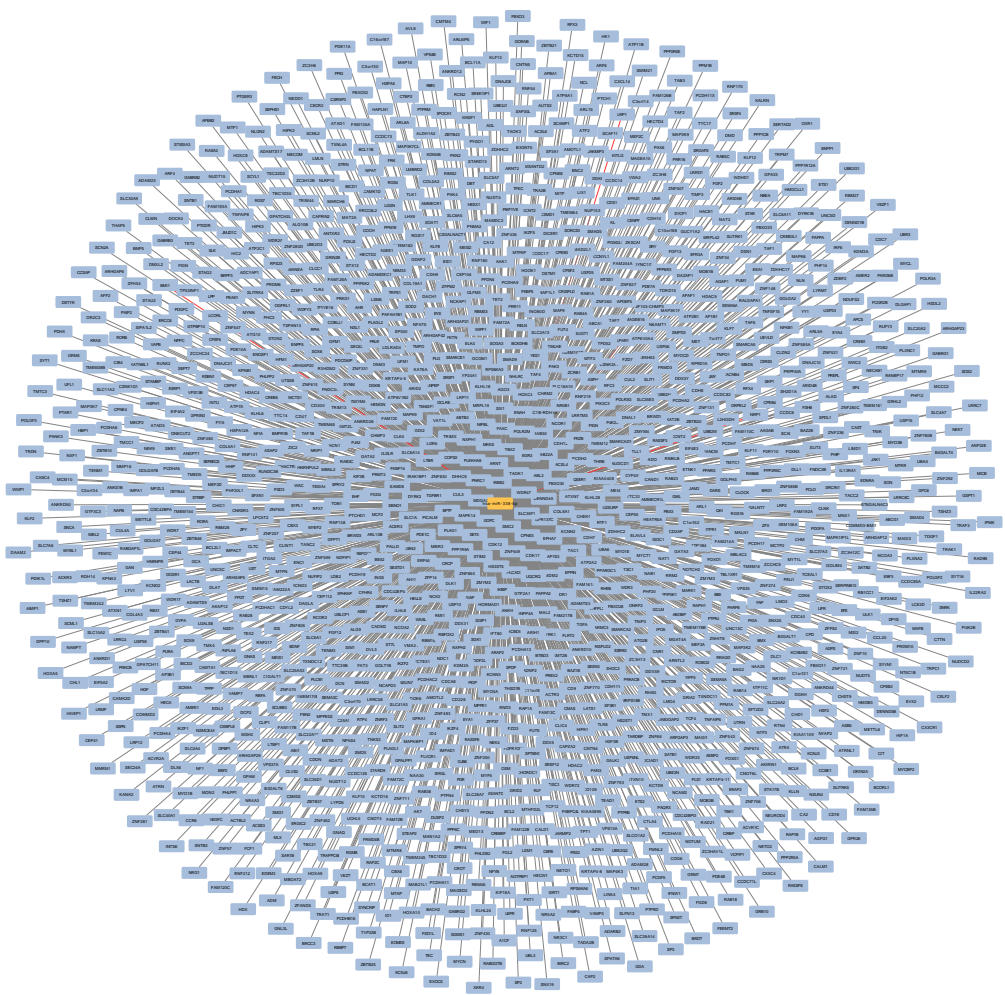

Supplement: s1 [file s1]
